# Supplementary material for: Systems level expression correlation of Ras GTPase regulators
Source: Cell Commun Signal. 2018 Aug 15;16:46. doi: 10.1186/s12964-018-0256-8 (PMC6094892; doi:10.1186/s12964-018-0256-8)
Supplement: Supplementary file 3 — RAS members and GEF and GAP regulators. (XLSX 83 kb) [file 12964_2018_256_MOESM3_ESM.xlsx]

## Sheet: Sheet1
Additional file 3. List of RAS subfamily members and their GEF and GAP regulators.
Human
RAS				RAS GEF				RAS GAP
ENSG00000176490	DIRAS1			ENSG00000171798	KNDC1			ENSG00000136848	DAB2IP
ENSG00000165023	DIRAS2			ENSG00000138193	PLCE1			ENSG00000136895	GARNL3
ENSG00000162595	DIRAS3			ENSG00000160271	RALGDS			ENSG00000196712	NF1
ENSG00000187682	ERAS			ENSG00000136828	RALGPS1			ENSG00000164050	PLXNB1
ENSG00000164949	GEM			ENSG00000116191	RALGPS2			ENSG00000174373	RALGAPA1
ENSG00000174775	HRAS			ENSG00000107263	RAPGEF1			ENSG00000188559	RALGAPA2
ENSG00000133703	KRAS			ENSG00000109756	RAPGEF2			ENSG00000076864	RAP1GAP
ENSG00000158186	MRAS			ENSG00000079337	RAPGEF3			ENSG00000132359	RAP1GAP2
ENSG00000197885	NKIRAS1			ENSG00000091428	RAPGEF4			ENSG00000145715	RASA1
ENSG00000168256	NKIRAS2			ENSG00000136237	RAPGEF5			ENSG00000155903	RASA2
ENSG00000213281	NRAS			ENSG00000158987	RAPGEF6			ENSG00000185989	RASA3
ENSG00000006451	RALA			ENSG00000108352	RAPGEFL1			ENSG00000105808	RASA4
ENSG00000144118	RALB			ENSG00000198915	RASGEF1A			ENSG00000111344	RASAL1
ENSG00000116473	RAP1A			ENSG00000138670	RASGEF1B			ENSG00000075391	RASAL2
ENSG00000127314	RAP1B			ENSG00000146090	RASGEF1C			ENSG00000105122	RASAL3
ENSG00000125249	RAP2A			ENSG00000058335	RASGRF1			ENSG00000213445	SIPA1
ENSG00000181467	RAP2B			ENSG00000113319	RASGRF2			ENSG00000197555	SIPA1L1
ENSG00000123728	RAP2C			ENSG00000172575	RASGRP1			ENSG00000116991	SIPA1L2
ENSG00000108551	RASD1			ENSG00000068831	RASGRP2			ENSG00000105738	SIPA1L3
ENSG00000100302	RASD2			ENSG00000152689	RASGRP3			ENSG00000197283	SYNGAP1
ENSG00000100276	RASL10A			ENSG00000171777	RASGRP4			ENSG00000103197	TSC2
ENSG00000270885	RASL10B			ENSG00000143344	RGL1
ENSG00000122035	RASL11A			ENSG00000237441	RGL2
ENSG00000128045	RASL11B			ENSG00000205517	RGL3
ENSG00000103710	RASL12			ENSG00000159496	RGL4
ENSG00000088320	REM1			ENSG00000115904	SOS1
ENSG00000139890	REM2			ENSG00000100485	SOS2
ENSG00000134533	RERG
ENSG00000111404	RERGL
ENSG00000106615	RHEB
ENSG00000167550	RHEBL1
ENSG00000143622	RIT1
ENSG00000152214	RIT2
ENSG00000166592	RRAD
ENSG00000126458	RRAS
ENSG00000133818	RRAS2
Gorilla
RAS				RAS GEF				RAS GAP
ENSG00000176490	ENSGGOG00000004553	DIRAS1		ENSG00000171798	ENSGGOG00000001091	KNDC1		ENSG00000136848	ENSGGOG00000000186	DAB2IP
ENSG00000165023	ENSGGOG00000002172	DIRAS2		ENSG00000138193	ENSGGOG00000007807	PLCE1		ENSG00000136895	ENSGGOG00000012871	GARNL3
ENSG00000162595	ENSGGOG00000006563	DIRAS3		ENSG00000160271	ENSGGOG00000003440	RALGDS		ENSG00000196712	ENSGGOG00000006983	NF1
ENSG00000187682	ENSGGOG00000004536	ERAS		ENSG00000136828	ENSGGOG00000015706	RALGPS1		ENSG00000164050	ENSGGOG00000006231	PLXNB1
ENSG00000164949	ENSGGOG00000013020	GEM		ENSG00000116191	ENSGGOG00000007862	RALGPS2		ENSG00000174373	ENSGGOG00000008354	RALGAPA1
ENSG00000174775	ENSGGOG00000015438	HRAS		ENSG00000107263	ENSGGOG00000008226	RAPGEF1		ENSG00000188559	ENSGGOG00000006329	RALGAPA2
ENSG00000133703	ENSGGOG00000008043	KRAS		ENSG00000109756	ENSGGOG00000005303	RAPGEF2		ENSG00000076864	ENSGGOG00000010722	RAP1GAP
ENSG00000158186	ENSGGOG00000011092	MRAS		ENSG00000079337	ENSGGOG00000016430	RAPGEF3		ENSG00000132359	ENSGGOG00000012703	RAP1GAP2
ENSG00000197885	ENSGGOG00000013354	NKIRAS1		ENSG00000091428	ENSGGOG00000009121	RAPGEF4		ENSG00000145715	ENSGGOG00000001591	RASA1
ENSG00000168256	ENSGGOG00000001000	NKIRAS2		ENSG00000136237	ENSGGOG00000017128	RAPGEF5		ENSG00000155903	ENSGGOG00000023738	RASA2
ENSG00000213281	ENSGGOG00000002163	N/A		ENSG00000158987	ENSGGOG00000005941	N/A		ENSG00000185989	ENSGGOG00000008967	RASA3
ENSG00000006451	ENSGGOG00000002908	RALA		ENSG00000108352	ENSGGOG00000005071	RAPGEFL1		ENSG00000105808	ENSGGOG00000024701	N/A
ENSG00000144118	ENSGGOG00000001648	RALB		ENSG00000198915	ENSGGOG00000004902	RASGEF1A		ENSG00000105808	ENSGGOG00000028182	N/A
ENSG00000116473	ENSGGOG00000003037	RAP1A		ENSG00000138670	ENSGGOG00000001423	RASGEF1B		ENSG00000105808	ENSGGOG00000000060	N/A
ENSG00000127314	ENSGGOG00000025649	N/A		ENSG00000146090	ENSGGOG00000003137	RASGEF1C		ENSG00000111344	ENSGGOG00000010388	RASAL1
ENSG00000125249	ENSGGOG00000026630	RAP2A		ENSG00000058335	ENSGGOG00000009950	RASGRF1		ENSG00000075391	ENSGGOG00000001070	RASAL2
ENSG00000181467	ENSGGOG00000006464	RAP2B		ENSG00000113319	ENSGGOG00000006976	RASGRF2		ENSG00000105122	ENSGGOG00000000560	RASAL3
ENSG00000123728	ENSGGOG00000021967	RAP2C		ENSG00000172575	ENSGGOG00000002051	RASGRP1		ENSG00000213445	ENSGGOG00000011796	SIPA1
ENSG00000108551	ENSGGOG00000011248	RASD1		ENSG00000068831	ENSGGOG00000012695	RASGRP2		ENSG00000197555	ENSGGOG00000013648	SIPA1L1
ENSG00000100302	ENSGGOG00000000861	RASD2		ENSG00000152689	N/A	N/A		ENSG00000116991	ENSGGOG00000000793	SIPA1L2
ENSG00000100276	ENSGGOG00000012236	RASL10A		ENSG00000171777	ENSGGOG00000004473	RASGRP4		ENSG00000105738	ENSGGOG00000006506	SIPA1L3
ENSG00000270885	ENSGGOG00000015607	RASL10B		ENSG00000143344	ENSGGOG00000012659	RGL1		ENSG00000197283	ENSGGOG00000009923	SYNGAP1
ENSG00000122035	ENSGGOG00000008785	RASL11A		ENSG00000237441	ENSGGOG00000006585	RGL2		ENSG00000103197	ENSGGOG00000027370	TSC2
ENSG00000128045	ENSGGOG00000012197	RASL11B		ENSG00000205517	ENSGGOG00000022422	RGL3
ENSG00000103710	ENSGGOG00000024110	RASL12		ENSG00000159496	ENSGGOG00000008335	RGL4
ENSG00000088320	ENSGGOG00000000990	REM1		ENSG00000115904	ENSGGOG00000026950	SOS1
ENSG00000139890	ENSGGOG00000015704	REM2		ENSG00000100485	ENSGGOG00000015477	SOS2
ENSG00000134533	ENSGGOG00000011718	RERG
ENSG00000111404	ENSGGOG00000014671	RERGL
ENSG00000106615	ENSGGOG00000026274	N/A
ENSG00000106615	ENSGGOG00000014675	N/A
ENSG00000167550	ENSGGOG00000007983	RHEBL1
ENSG00000143622	ENSGGOG00000001461	RIT1
ENSG00000152214	ENSGGOG00000005603	N/A
ENSG00000166592	ENSGGOG00000012351	RRAD
ENSG00000126458	N/A	N/A
ENSG00000133818	ENSGGOG00000024745	N/A
ENSG00000133818	ENSGGOG00000004759	N/A
Chimpanzee	(same gene IDs for Bonobo)
RAS				RAS GEF				RAS GAP
ENSG00000176490	ENSPTRG00000029182	DIRAS1		ENSG00000171798	ENSPTRG00000003085	N/A		ENSG00000136848	ENSPTRG00000021317	DAB2IP
ENSG00000165023	ENSPTRG00000021097	DIRAS2		ENSG00000138193	ENSPTRG00000002775	PLCE1		ENSG00000136895	ENSPTRG00000021385	GARNL3
ENSG00000162595	ENSPTRG00000000844	DIRAS3		ENSG00000160271	ENSPTRG00000021509	RALGDS		ENSG00000196712	ENSPTRG00000008970	NF1
ENSG00000187682	N/A	N/A		ENSG00000136828	ENSPTRG00000021382	RALGPS1		ENSG00000164050	ENSPTRG00000014884	PLXNB1
ENSG00000164949	ENSPTRG00000020426	GEM		ENSG00000116191	ENSPTRG00000001722	RALGPS2		ENSG00000174373	ENSPTRG00000006268	RALGAPA1
ENSG00000174775	ENSPTRG00000034469	HRAS		ENSG00000107263	ENSPTRG00000021490	RAPGEF1		ENSG00000188559	ENSPTRG00000013306	RALGAPA2
ENSG00000133703	ENSPTRG00000004775	KRAS		ENSG00000109756	ENSPTRG00000016558	RAPGEF2		ENSG00000076864	ENSPTRG00000000303	RAP1GAP
ENSG00000158186	ENSPTRG00000015445	MRAS		ENSG00000079337	ENSPTRG00000004866	RAPGEF3		ENSG00000132359	ENSPTRG00000008553	RAP1GAP2
ENSG00000197885	ENSPTRG00000014694	NKIRAS1		ENSG00000091428	ENSPTRG00000012643	RAPGEF4		ENSG00000145715	ENSPTRG00000017062	RASA1
ENSG00000168256	ENSPTRG00000009189	NKIRAS2		ENSG00000136237	ENSPTRG00000018976	RAPGEF5		ENSG00000155903	ENSPTRG00000015472	RASA2
ENSG00000213281	ENSPTRG00000001140	NRAS		ENSG00000158987	ENSPTRG00000017209	RAPGEF6		ENSG00000185989	ENSPTRG00000006069	RASA3
ENSG00000006451	ENSPTRG00000019108	RALA		ENSG00000108352	ENSPTRG00000009116	RAPGEFL1		ENSG00000105808	ENSPTRG00000019540	N/A
ENSG00000144118	ENSPTRG00000012410	RALB		ENSG00000198915	ENSPTRG00000002444	RASGEF1A		ENSG00000111344	ENSPTRG00000005481	RASAL1
ENSG00000116473	ENSPTRG00000001102	RAP1A		ENSG00000138670	ENSPTRG00000016213	RASGEF1B		ENSG00000075391	ENSPTRG00000001717	RASAL2
ENSG00000127314	ENSPTRG00000005197	RAP1B		ENSG00000146090	ENSPTRG00000017631	RASGEF1C		ENSG00000105122	ENSPTRG00000033776	N/A
ENSG00000125249	ENSPTRG00000005983	RAP2A		ENSG00000058335	ENSPTRG00000007353	RASGRF1		ENSG00000213445	ENSPTRG00000034510	SIPA1
ENSG00000181467	ENSPTRG00000015544	RAP2B		ENSG00000113319	ENSPTRG00000017044	RASGRF2		ENSG00000197555	ENSPTRG00000023075	SIPA1L1
ENSG00000123728	N/A	N/A		ENSG00000172575	ENSPTRG00000006905	RASGRP1		ENSG00000116991	ENSPTRG00000002114	SIPA1L2
ENSG00000108551	ENSPTRG00000008831	RASD1		ENSG00000068831	ENSPTRG00000003844	RASGRP2		ENSG00000105738	ENSPTRG00000010917	SIPA1L3
ENSG00000100302	ENSPTRG00000014300	RASD2		ENSG00000152689	ENSPTRG00000011824	RASGRP3		ENSG00000197283	ENSPTRG00000033928	SYNGAP1
ENSG00000100276	ENSPTRG00000014220	RASL10A		ENSG00000171777	ENSPTRG00000010930	RASGRP4		ENSG00000103197	ENSPTRG00000031311	TSC2
ENSG00000270885	ENSPTRG00000009022	RASL10B		ENSG00000143344	ENSPTRG00000001768	RGL1
ENSG00000122035	ENSPTRG00000005729	RASL11A		ENSG00000237441	ENSPTRG00000018042	RGL2
ENSG00000128045	ENSPTRG00000016058	RASL11B		ENSG00000205517	ENSPTRG00000010502	RGL3
ENSG00000103710	ENSPTRG00000007173	RASL12		ENSG00000159496	ENSPTRG00000014147	RGL4
ENSG00000088320	ENSPTRG00000013354	REM1		ENSG00000115904	ENSPTRG00000011857	SOS1
ENSG00000139890	ENSPTRG00000006150	REM2		ENSG00000100485	ENSPTRG00000006328	SOS2
ENSG00000134533	ENSPTRG00000004731	RERG
ENSG00000111404	ENSPTRG00000004739	RERGL
ENSG00000106615	ENSPTRG00000042112	RHEB
ENSG00000167550	ENSPTRG00000004897	RHEBL1
ENSG00000143622	ENSPTRG00000001437	RIT1
ENSG00000152214	ENSPTRG00000009984	RIT2
ENSG00000166592	ENSPTRG00000008207	RRAD
ENSG00000126458	ENSPTRG00000011307	RRAS
ENSG00000133818	ENSPTRG00000003383	RRAS2
Orangutan
RAS				RAS GEF				RAS GAP
ENSG00000176490	ENSPPYG00000010579	DIRAS1		ENSG00000171798	ENSPPYG00000002787	KNDC1		ENSG00000136848	ENSPPYG00000019566	DAB2IP
ENSG00000165023	ENSPPYG00000019365	DIRAS2		ENSG00000138193	ENSPPYG00000002499	PLCE1		ENSG00000136895	ENSPPYG00000019619	GARNL3
ENSG00000162595	ENSPPYG00000001252	DIRAS3		ENSG00000160271	ENSPPYG00000019723	RALGDS		ENSG00000196712	ENSPPYG00000008147	NF1
ENSG00000187682	ENSPPYG00000020321	ERAS		ENSG00000136828	ENSPPYG00000019617	RALGPS1		ENSG00000164050	ENSPPYG00000013906	PLXNB1
ENSG00000164949	ENSPPYG00000018749	GEM		ENSG00000116191	ENSPPYG00000000467	RALGPS2		ENSG00000174373	ENSPPYG00000005746	RALGAPA1
ENSG00000174775	ENSPPYG00000002868	HRAS		ENSG00000107263	ENSPPYG00000019705	RAPGEF1		ENSG00000188559	ENSPPYG00000010751	RALGAPA2
ENSG00000133703	ENSPPYG00000004369	KRAS		ENSG00000109756	ENSPPYG00000029656	RAPGEF2		ENSG00000076864	ENSPPYG00000001759	RAP1GAP
ENSG00000158186	ENSPPYG00000014142	MRAS		ENSG00000079337	N/A	N/A		ENSG00000132359	ENSPPYG00000007798	RAP1GAP2
ENSG00000197885	ENSPPYG00000014066	NKIRAS1		ENSG00000091428	ENSPPYG00000012938	RAPGEF4		ENSG00000145715	ENSPPYG00000015618	RASA1
ENSG00000168256	ENSPPYG00000008401	NKIRAS2		ENSG00000136237	ENSPPYG00000017743	N/A		ENSG00000155903	ENSPPYG00000014165	RASA2
ENSG00000213281	ENSPPYG00000000997	NRAS		ENSG00000158987	ENSPPYG00000015750	N/A		ENSG00000185989	ENSPPYG00000005534	RASA3
ENSG00000006451	ENSPPYG00000017619	RALA		ENSG00000108352	ENSPPYG00000008466	RAPGEFL1		ENSG00000105808	ENSPPYG00000017459	N/A
ENSG00000144118	ENSPPYG00000012781	RALB		ENSG00000198915	ENSPPYG00000002210	RASGEF1A		ENSG00000111344	ENSPPYG00000004981	RASAL1
ENSG00000116473	ENSPPYG00000001028	RAP1A		ENSG00000138670	ENSPPYG00000014884	RASGEF1B		ENSG00000075391	ENSPPYG00000000473	RASAL2
ENSG00000127314	ENSPPYG00000004751	RAP1B		ENSG00000146090	ENSPPYG00000016134	RASGEF1C		ENSG00000105122	ENSPPYG00000029373	N/A
ENSG00000125249	ENSPPYG00000005457	RAP2A		ENSG00000058335	ENSPPYG00000006705	RASGRF1		ENSG00000213445	ENSPPYG00000003050	N/A
ENSG00000181467	ENSPPYG00000014220	RAP2B		ENSG00000113319	ENSPPYG00000015602	RASGRF2		ENSG00000197555	ENSPPYG00000005960	SIPA1L1
ENSG00000123728	ENSPPYG00000020725	RAP2C		ENSG00000172575	ENSPPYG00000006337	RASGRP1		ENSG00000116991	ENSPPYG00000000110	SIPA1L2
ENSG00000108551	ENSPPYG00000008032	RASD1		ENSG00000068831	ENSPPYG00000029839	N/A		ENSG00000105738	ENSPPYG00000009923	SIPA1L3
ENSG00000100302	ENSPPYG00000011764	RASD2		ENSG00000152689	ENSPPYG00000012501	RASGRP3		ENSG00000197283	ENSPPYG00000016500	SYNGAP1
ENSG00000100276	ENSPPYG00000011686	RASL10A		ENSG00000171777	ENSPPYG00000009935	RASGRP4		ENSG00000103197	ENSPPYG00000006986	TSC2
ENSG00000270885	ENSPPYG00000008190	RASL10B		ENSG00000143344	ENSPPYG00000000423	RGL1
ENSG00000122035	ENSPPYG00000005234	RASL11A		ENSG00000237441	ENSPPYG00000017247	RGL2
ENSG00000128045	ENSPPYG00000014775	RASL11B		ENSG00000205517	ENSPPYG00000009580	RGL3
ENSG00000103710	ENSPPYG00000006560	RASL12		ENSG00000159496	ENSPPYG00000011625	RGL4
ENSG00000088320	ENSPPYG00000010886	REM1		ENSG00000115904	ENSPPYG00000012474	SOS1
ENSG00000139890	ENSPPYG00000005648	REM2		ENSG00000100485	ENSPPYG00000005799	SOS2
ENSG00000134533	ENSPPYG00000004331	RERG
ENSG00000111404	ENSPPYG00000004340	RERGL
ENSG00000106615	ENSPPYG00000018196	RHEB
ENSG00000167550	ENSPPYG00000004479	RHEBL1
ENSG00000143622	ENSPPYG00000000737	RIT1
ENSG00000152214	ENSPPYG00000009121	RIT2
ENSG00000166592	ENSPPYG00000007432	RRAD
ENSG00000126458	ENSPPYG00000010258	RRAS
ENSG00000133818	ENSPPYG00000025912	RRAS2
Macaca mulatta
RAS				RAS GEF				RAS GAP
ENSG00000176490	ENSMMUG00000040263	DIRAS1		ENSG00000171798	ENSMMUG00000006089	KNDC1		ENSG00000136848	ENSMMUG00000004639	DAB2IP
ENSG00000165023	ENSMMUG00000007223	DIRAS2		ENSG00000138193	ENSMMUG00000001608	PLCE1		ENSG00000136895	ENSMMUG00000012163	GARNL3
ENSG00000162595	ENSMMUG00000013333	DIRAS3		ENSG00000160271	ENSMMUG00000015274	RALGDS		ENSG00000196712	ENSMMUG00000008605	NF1
ENSG00000187682	ENSMMUG00000016467	ERAS		ENSG00000136828	ENSMMUG00000023495	RALGPS1		ENSG00000164050	ENSMMUG00000003074	PLXNB1
ENSG00000164949	N/A	N/A		ENSG00000116191	ENSMMUG00000017551	RALGPS2		ENSG00000174373	ENSMMUG00000016487	RALGAPA1
ENSG00000174775	ENSMMUG00000021659	HRAS		ENSG00000107263	ENSMMUG00000006479	RAPGEF1		ENSG00000188559	ENSMMUG00000018371	RALGAPA2
ENSG00000133703	ENSMMUG00000015381	KRAS		ENSG00000109756	ENSMMUG00000010581	RAPGEF2		ENSG00000076864	ENSMMUG00000002218	RAP1GAP
ENSG00000158186	ENSMMUG00000007756	MRAS		ENSG00000079337	ENSMMUG00000000477	RAPGEF3		ENSG00000132359	ENSMMUG00000022989	RAP1GAP2
ENSG00000197885	ENSMMUG00000006352	NKIRAS1		ENSG00000091428	ENSMMUG00000020792	RAPGEF4		ENSG00000145715	ENSMMUG00000003245	RASA1
ENSG00000168256	ENSMMUG00000014275	NKIRAS2		ENSG00000136237	ENSMMUG00000002987	RAPGEF5		ENSG00000155903	ENSMMUG00000009418	RASA2
ENSG00000213281	ENSMMUG00000049105	NRAS		ENSG00000158987	ENSMMUG00000006165	FNIP1		ENSG00000185989	ENSMMUG00000007434	RASA3
ENSG00000006451	ENSMMUG00000042241	RALA		ENSG00000108352	ENSMMUG00000015160	RAPGEFL1		ENSG00000105808	ENSMMUG00000030384	N/A
ENSG00000144118	ENSMMUG00000046774	RALB		ENSG00000198915	ENSMMUG00000015406	RASGEF1A		ENSG00000111344	ENSMMUG00000021793	RASAL1
ENSG00000116473	ENSMMUG00000014486	RAP1A		ENSG00000138670	ENSMMUG00000021074	RASGEF1B		ENSG00000075391	ENSMMUG00000021073	RASAL2
ENSG00000127314	ENSMMUG00000011442	RAP1B		ENSG00000146090	ENSMMUG00000000635	RASGEF1C		ENSG00000105122	N/A	N/A
ENSG00000125249	ENSMMUG00000047433	N/A		ENSG00000058335	N/A	N/A		ENSG00000213445	ENSMMUG00000007416	SIPA1
ENSG00000181467	ENSMMUG00000015779	RAP2B		ENSG00000113319	ENSMMUG00000039944	RASGRF2		ENSG00000197555	ENSMMUG00000020067	SIPA1L1
ENSG00000123728	ENSMMUG00000048745	RAP2C		ENSG00000172575	ENSMMUG00000018333	RASGRP1		ENSG00000116991	ENSMMUG00000012068	SIPA1L2
ENSG00000108551	ENSMMUG00000006493	RASD1		ENSG00000068831	ENSMMUG00000022598	RASGRP2		ENSG00000105738	ENSMMUG00000003492	SIPA1L3
ENSG00000100302	N/A	N/A		ENSG00000152689	ENSMMUG00000045520	RASGRP3		ENSG00000197283	ENSMMUG00000010659	SYNGAP1
ENSG00000100276	ENSMMUG00000021378	RASL10A		ENSG00000171777	ENSMMUG00000020469	RASGRP4		ENSG00000103197	ENSMMUG00000002808	TSC2
ENSG00000270885	ENSMMUG00000013143	RASL10B		ENSG00000143344	ENSMMUG00000016399	RGL1
ENSG00000122035	N/A	N/A		ENSG00000237441	ENSMMUG00000003872	RGL2
ENSG00000128045	ENSMMUG00000037547	RASL11B		ENSG00000205517	ENSMMUG00000010826	RGL3
ENSG00000103710	ENSMMUG00000004029	RASL12		ENSG00000159496	ENSMMUG00000047978	RGL4
ENSG00000088320	N/A	N/A		ENSG00000115904	ENSMMUG00000020575	SOS1
ENSG00000139890	N/A	N/A		ENSG00000100485	ENSMMUG00000007464	SOS2
ENSG00000134533	ENSMMUG00000010460	RERG
ENSG00000111404	ENSMMUG00000047016	RERGL
ENSG00000106615	N/A	N/A
ENSG00000167550	ENSMMUG00000015721	RHEBL1
ENSG00000143622	N/A	N/A
ENSG00000152214	ENSMMUG00000038452	RIT2
ENSG00000166592	N/A	N/A
ENSG00000126458	ENSMMUG00000028733	RRAS
ENSG00000133818	ENSMMUG00000000664	RRAS2
Mus musculus
RAS				RAS GEF				RAS GAP
ENSG00000176490	ENSMUSG00000043670	DIRAS1		ENSG00000171798	ENSMUSG00000066129	KNDC1		ENSG00000136848	ENSMUSG00000026883	DAB2IP
ENSG00000165023	ENSMUSG00000047842	DIRAS2		ENSG00000138193	ENSMUSG00000024998	PLCE1		ENSG00000136895	ENSMUSG00000038860	GARNL3
ENSG00000162595	N/A	N/A		ENSG00000160271	ENSMUSG00000026821	RALGDS		ENSG00000196712	ENSMUSG00000020716	NF1
ENSG00000187682	ENSMUSG00000031160	ERAS		ENSG00000136828	ENSMUSG00000038831	RALGPS1		ENSG00000164050	ENSMUSG00000053646	PLXNB1
ENSG00000164949	ENSMUSG00000028214	GEM		ENSG00000116191	ENSMUSG00000026594	RALGPS2		ENSG00000174373	ENSMUSG00000021027	RALGAPA1
ENSG00000174775	ENSMUSG00000025499	HRAS		ENSG00000107263	ENSMUSG00000039844	RAPGEF1		ENSG00000188559	ENSMUSG00000037110	RALGAPA2
ENSG00000133703	ENSMUSG00000030265	KRAS		ENSG00000109756	ENSMUSG00000062232	RAPGEF2		ENSG00000076864	ENSMUSG00000041351	RAP1GAP
ENSG00000158186	ENSMUSG00000032470	MRAS		ENSG00000079337	ENSMUSG00000022469	RAPGEF3		ENSG00000132359	ENSMUSG00000038807	RAP1GAP2
ENSG00000197885	ENSMUSG00000021772	NKIRAS1		ENSG00000091428	ENSMUSG00000049044	RAPGEF4		ENSG00000145715	ENSMUSG00000021549	RASA1
ENSG00000168256	ENSMUSG00000017837	NKIRAS2		ENSG00000136237	ENSMUSG00000041992	RAPGEF5		ENSG00000155903	ENSMUSG00000032413	RASA2
ENSG00000213281	ENSMUSG00000027852	NRAS		ENSG00000158987	ENSMUSG00000037533	RAPGEF6		ENSG00000185989	ENSMUSG00000031453	RASA3
ENSG00000006451	ENSMUSG00000008859	RALA		ENSG00000108352	ENSMUSG00000038020	RAPGEFL1		ENSG00000105808	ENSMUSG00000004952	RASA4
ENSG00000144118	ENSMUSG00000004451	RALB		ENSG00000198915	ENSMUSG00000030134	RASGEF1A		ENSG00000111344	ENSMUSG00000029602	RASAL1
ENSG00000116473	ENSMUSG00000068798	RAP1A		ENSG00000138670	ENSMUSG00000029333	RASGEF1B		ENSG00000075391	ENSMUSG00000070565	RASAL2
ENSG00000127314	ENSMUSG00000052681	RAP1B		ENSG00000138670	ENSMUSG00000109804	RP23-253I14.4		ENSG00000105122	ENSMUSG00000052142	RASAL3
ENSG00000125249	ENSMUSG00000051615	RAP2A		ENSG00000146090	ENSMUSG00000020374	RASGEF1C		ENSG00000213445	ENSMUSG00000056917	SIPA1
ENSG00000181467	ENSMUSG00000036894	RAP2B		ENSG00000058335	ENSMUSG00000032356	RASGRF1		ENSG00000197555	ENSMUSG00000042700	SIPA1L1
ENSG00000123728	ENSMUSG00000050029	RAP2C		ENSG00000113319	ENSMUSG00000021708	RASGRF2		ENSG00000116991	ENSMUSG00000001995	SIPA1L2
ENSG00000108551	ENSMUSG00000049892	RASD1		ENSG00000172575	ENSMUSG00000027347	RASGRP1		ENSG00000105738	ENSMUSG00000030583	SIPA1L3
ENSG00000100302	ENSMUSG00000034472	RASD2		ENSG00000068831	ENSMUSG00000032946	RASGRP2		ENSG00000197283	ENSMUSG00000067629	SYNGAP1
ENSG00000100276	ENSMUSG00000034209	RASL10A		ENSG00000152689	ENSMUSG00000071042	RASGRP3		ENSG00000103197	ENSMUSG00000002496	TSC2
ENSG00000270885	ENSMUSG00000020684	RASL10B		ENSG00000171777	ENSMUSG00000030589	RASGRP4
ENSG00000122035	ENSMUSG00000029641	RASL11A		ENSG00000143344	ENSMUSG00000026482	RGL1
ENSG00000128045	ENSMUSG00000049907	RASL11B		ENSG00000237441	ENSMUSG00000041354	RGL2
ENSG00000103710	ENSMUSG00000041696	RASL12		ENSG00000205517	ENSMUSG00000040146	RGL3
ENSG00000088320	ENSMUSG00000000359	REM1		ENSG00000159496	N/A	N/A
ENSG00000139890	ENSMUSG00000022176	REM2		ENSG00000115904	ENSMUSG00000024241	SOS1
ENSG00000134533	ENSMUSG00000030222	RERG		ENSG00000100485	ENSMUSG00000034801	SOS2
ENSG00000111404	ENSMUSG00000092164	RERGL
ENSG00000106615	ENSMUSG00000028945	RHEB
ENSG00000167550	ENSMUSG00000023755	RHEBL1
ENSG00000143622	ENSMUSG00000028057	RIT1
ENSG00000152214	ENSMUSG00000057455	RIT2
ENSG00000166592	ENSMUSG00000031880	RRAD
ENSG00000126458	ENSMUSG00000038387	RRAS
ENSG00000133818	ENSMUSG00000055723	RRAS2
Monodelphis domestica
RAS				RAS GEF				RAS GAP
ENSG00000176490	ENSMODG00000023915	DIRAS1		ENSG00000171798	ENSMODG00000016642	N/A		ENSG00000136848	ENSMODG00000019667	DAB2IP
ENSG00000165023	ENSMODG00000025431	DIRAS2		ENSG00000171798	ENSMODG00000019607	N/A		ENSG00000136895	ENSMODG00000019806	GARNL3
ENSG00000162595	N/A	N/A		ENSG00000138193	ENSMODG00000005750	PLCE1		ENSG00000196712	ENSMODG00000028934	N/A
ENSG00000187682	ENSMODG00000019072	N/A		ENSG00000160271	ENSMODG00000012656	N/A		ENSG00000196712	ENSMODG00000019215	N/A
ENSG00000187682	ENSMODG00000019076	N/A		ENSG00000136828	ENSMODG00000019794	RALGPS1		ENSG00000164050	ENSMODG00000014384	PLXNB1
ENSG00000164949	ENSMODG00000007348	GEM		ENSG00000116191	ENSMODG00000006032	RALGPS2		ENSG00000174373	ENSMODG00000012779	RALGAPA1
ENSG00000174775	N/A	N/A		ENSG00000107263	ENSMODG00000012492	RAPGEF1		ENSG00000188559	ENSMODG00000006089	RALGAPA2
ENSG00000133703	ENSMODG00000025248	N/A		ENSG00000109756	ENSMODG00000002092	RAPGEF2		ENSG00000076864	N/A	N/A
ENSG00000133703	ENSMODG00000017458	KRAS		ENSG00000079337	N/A	N/A		ENSG00000132359	ENSMODG00000010843	RAP1GAP2
ENSG00000158186	ENSMODG00000018565	MRAS		ENSG00000091428	ENSMODG00000009089	RAPGEF4		ENSG00000145715	ENSMODG00000020235	RASA1
ENSG00000197885	ENSMODG00000014879	NKIRAS1		ENSG00000136237	ENSMODG00000001277	RAPGEF5		ENSG00000155903	ENSMODG00000021230	RASA2
ENSG00000168256	ENSMODG00000014766	NKIRAS2		ENSG00000158987	ENSMODG00000014131	N/A		ENSG00000185989	ENSMODG00000003579	RASA3
ENSG00000213281	ENSMODG00000004590	NRAS		ENSG00000108352	ENSMODG00000013094	RAPGEFL1		ENSG00000105808	ENSMODG00000013627	N/A
ENSG00000006451	ENSMODG00000012643	RALA		ENSG00000198915	ENSMODG00000001262	RASGEF1A		ENSG00000111344	ENSMODG00000003383	RASAL1
ENSG00000144118	ENSMODG00000000264	RALB		ENSG00000138670	ENSMODG00000011880	RASGEF1B		ENSG00000075391	ENSMODG00000005974	RASAL2
ENSG00000116473	ENSMODG00000001323	N/A		ENSG00000146090	ENSMODG00000004052	RASGEF1C		ENSG00000105122	ENSMODG00000029438	N/A
ENSG00000116473	ENSMODG00000018937	N/A		ENSG00000058335	ENSMODG00000019438	RASGRF1		ENSG00000213445	N/A	N/A
ENSG00000127314	ENSMODG00000007323	RAP1B		ENSG00000113319	ENSMODG00000020263	RASGRF2		ENSG00000197555	ENSMODG00000007046	SIPA1L1
ENSG00000125249	ENSMODG00000008543	RAP2A		ENSG00000172575	ENSMODG00000001139	RASGRP1		ENSG00000116991	ENSMODG00000008745	SIPA1L2
ENSG00000181467	ENSMODG00000024599	RAP2B		ENSG00000068831	N/A	N/A		ENSG00000105738	ENSMODG00000013113	SIPA1L3
ENSG00000123728	ENSMODG00000015308	RAP2C		ENSG00000152689	ENSMODG00000015433	RASGRP3		ENSG00000197283	ENSMODG00000014104	SYNGAP1
ENSG00000108551	ENSMODG00000004765	RASD1		ENSG00000171777	ENSMODG00000013190	RASGRP4		ENSG00000103197	ENSMODG00000016037	N/A
ENSG00000100302	ENSMODG00000001133	RASD2		ENSG00000143344	ENSMODG00000007272	RGL1		ENSG00000103197	ENSMODG00000016014	N/A
ENSG00000100276	ENSMODG00000008736	N/A		ENSG00000237441	ENSMODG00000014185	RGL2
ENSG00000270885	ENSMODG00000019126	RASL10B		ENSG00000205517	ENSMODG00000006601	RGL3
ENSG00000122035	ENSMODG00000008941	RASL11A		ENSG00000159496	ENSMODG00000012656	N/A
ENSG00000128045	ENSMODG00000020648	RASL11B		ENSG00000115904	ENSMODG00000008801	SOS1
ENSG00000103710	ENSMODG00000010404	RASL12		ENSG00000100485	ENSMODG00000011821	SOS2
ENSG00000088320	ENSMODG00000019500	REM1
ENSG00000139890	ENSMODG00000005212	REM2
ENSG00000134533	ENSMODG00000017938	RERG
ENSG00000111404	N/A	N/A
ENSG00000106615	N/A	N/A
ENSG00000167550	N/A	N/A
ENSG00000143622	ENSMODG00000016989	RIT1
ENSG00000152214	ENSMODG00000000206	RIT2
ENSG00000166592	ENSMODG00000006400	RRAD
ENSG00000126458	ENSMODG00000013611	RRAS
ENSG00000133818	ENSMODG00000028397	N/A
Ornithorhynchus anatinus
RAS				RAS GEF				RAS GAP
ENSG00000176490	ENSOANG00000015272	N/A		ENSG00000171798	ENSOANG00000030954	N/A		ENSG00000136848	ENSOANG00000011959	DAB2IP
ENSG00000165023	ENSOANG00000007765	DIRAS2		ENSG00000138193	ENSOANG00000031653	N/A		ENSG00000136895	ENSOANG00000014699	N/A
ENSG00000162595	N/A	N/A		ENSG00000138193	ENSOANG00000031987	N/A		ENSG00000136895	ENSOANG00000011710	N/A
ENSG00000187682	N/A	N/A		ENSG00000138193	ENSOANG00000029474	N/A		ENSG00000196712	ENSOANG00000005669	N/A
ENSG00000164949	ENSOANG00000021218	N/A		ENSG00000138193	ENSOANG00000030004	N/A		ENSG00000196712	ENSOANG00000021856	N/A
ENSG00000174775	N/A	N/A		ENSG00000160271	ENSOANG00000014726	N/A		ENSG00000164050	ENSOANG00000004295	PLXNB1
ENSG00000133703	ENSOANG00000009650	KRAS		ENSG00000136828	ENSOANG00000011012	N/A		ENSG00000174373	ENSOANG00000014058	RALGAPA1
ENSG00000158186	ENSOANG00000007543	MRAS		ENSG00000116191	ENSOANG00000000954	RALGPS2		ENSG00000188559	ENSOANG00000002499	RALGAPA2
ENSG00000197885	ENSOANG00000031520	NKIRAS1		ENSG00000107263	ENSOANG00000014783	RAPGEF1		ENSG00000076864	ENSOANG00000005926	N/A
ENSG00000168256	ENSOANG00000004704	NKIRAS2		ENSG00000109756	ENSOANG00000014970	RAPGEF2		ENSG00000132359	ENSOANG00000010097	RAP1GAP2
ENSG00000213281	ENSOANG00000028779	NRAS		ENSG00000079337	N/A	N/A		ENSG00000145715	ENSOANG00000014753	RASA1
ENSG00000006451	ENSOANG00000009445	RALA		ENSG00000091428	ENSOANG00000008592	RAPGEF4		ENSG00000155903	ENSOANG00000002775	N/A
ENSG00000144118	ENSOANG00000005641	N/A		ENSG00000136237	ENSOANG00000011808	RAPGEF5		ENSG00000185989	ENSOANG00000012902	N/A
ENSG00000116473	ENSOANG00000003142	RAP1A		ENSG00000158987	ENSOANG00000006961	N/A		ENSG00000105808	ENSOANG00000000963	N/A
ENSG00000127314	N/A	N/A		ENSG00000108352	N/A	N/A		ENSG00000105808	ENSOANG00000010016	N/A
ENSG00000125249	N/A	N/A		ENSG00000198915	ENSOANG00000003170	RASGEF1A		ENSG00000111344	ENSOANG00000004409	N/A
ENSG00000181467	N/A	N/A		ENSG00000138670	N/A	N/A		ENSG00000075391	ENSOANG00000000953	RASAL2
ENSG00000123728	ENSOANG00000011699	RAP2C		ENSG00000146090	ENSOANG00000010229	RASGEF1C		ENSG00000105122	ENSOANG00000005135	RASAL3
ENSG00000108551	ENSOANG00000001260	RASD1		ENSG00000058335	ENSOANG00000002238	N/A		ENSG00000213445	ENSOANG00000031232	N/A
ENSG00000100302	ENSOANG00000010873	RASD2		ENSG00000113319	ENSOANG00000001603	RASGRF2		ENSG00000213445	ENSOANG00000000738	N/A
ENSG00000100276	ENSOANG00000002215	RASL10A		ENSG00000172575	ENSOANG00000030083	N/A		ENSG00000197555	ENSOANG00000014068	SIPA1L1
ENSG00000270885	N/A	N/A		ENSG00000068831	ENSOANG00000007479	RASGRP2		ENSG00000116991	ENSOANG00000004653	N/A
ENSG00000122035	ENSOANG00000009056	RASL11A		ENSG00000152689	ENSOANG00000002336	RASGRP3		ENSG00000105738	ENSOANG00000003414	N/A
ENSG00000128045	ENSOANG00000014749	N/A		ENSG00000171777	N/A	N/A		ENSG00000197283	N/A	N/A
ENSG00000128045	ENSOANG00000020272	N/A		ENSG00000143344	ENSOANG00000001001	N/A		ENSG00000103197	ENSOANG00000009994	N/A
ENSG00000103710	ENSOANG00000002563	RASL12		ENSG00000237441	ENSOANG00000029141	N/A		ENSG00000103197	ENSOANG00000028840	N/A
ENSG00000088320	N/A	N/A		ENSG00000205517	ENSOANG00000013850	RGL3
ENSG00000139890	ENSOANG00000003911	REM2		ENSG00000159496	ENSOANG00000014726	N/A
ENSG00000134533	N/A	N/A		ENSG00000115904	ENSOANG00000014976	SOS1
ENSG00000111404	ENSOANG00000014437	RERGL		ENSG00000100485	ENSOANG00000013979	SOS2
ENSG00000106615	N/A	N/A
ENSG00000167550	ENSOANG00000000139	RHEBL1
ENSG00000143622	N/A	N/A
ENSG00000152214	ENSOANG00000002749	RIT2
ENSG00000166592	ENSOANG00000013935	N/A
ENSG00000126458	ENSOANG00000031392	N/A
ENSG00000133818	ENSOANG00000012470	RRAS2
Chicken
RAS				RAS GEF				RAS GAP
ENSG00000176490	ENSGALG00000026955	DIRAS1		ENSG00000171798	ENSGALG00000046575	N/A		ENSG00000136848	ENSGALG00000001419	DAB2IP
ENSG00000165023	ENSGALG00000005323	DIRAS2		ENSG00000171798	ENSGALG00000007007	N/A		ENSG00000136895	ENSGALG00000000847	GARNL3
ENSG00000162595	N/A	N/A		ENSG00000138193	ENSGALG00000039528	N/A		ENSG00000196712	ENSGALG00000005660	NF1
ENSG00000187682	N/A	N/A		ENSG00000160271	ENSGALG00000003412	N/A		ENSG00000164050	ENSGALG00000006526	PLXNB1
ENSG00000164949	ENSGALG00000032506	GEM		ENSG00000136828	ENSGALG00000000906	RALGPS1		ENSG00000174373	ENSGALG00000010088	RALGAPA1
ENSG00000174775	ENSGALG00000029260	H-RAS		ENSG00000116191	ENSGALG00000004273	RALGPS2		ENSG00000188559	ENSGALG00000044730	N/A
ENSG00000174775	ENSGALG00000040551	N/A		ENSG00000107263	ENSGALG00000030884	N/A		ENSG00000188559	ENSGALG00000032964	N/A
ENSG00000174775	ENSGALG00000034526	H-RAS		ENSG00000109756	ENSGALG00000020249	RAPGEF2		ENSG00000076864	ENSGALG00000014701	RAP1GAP
ENSG00000133703	ENSGALG00000030943	KRAS		ENSG00000079337	ENSGALG00000043775	RAPGEF3		ENSG00000132359	ENSGALG00000033885	RAP1GAP2
ENSG00000158186	ENSGALG00000011592	MRAS		ENSG00000091428	ENSGALG00000043694	RAPGEF4		ENSG00000145715	ENSGALG00000031015	N/A
ENSG00000197885	ENSGALG00000011289	NKIRAS1		ENSG00000136237	ENSGALG00000034024	RAPGEF5		ENSG00000145715	ENSGALG00000036886	N/A
ENSG00000168256	ENSGALG00000028971	NKIRAS2		ENSG00000158987	ENSGALG00000029896	N/A		ENSG00000145715	ENSGALG00000017706	N/A
ENSG00000213281	ENSGALG00000026692	NRAS		ENSG00000108352	ENSGALG00000035690	RAPGEFL1		ENSG00000155903	ENSGALG00000002850	RASA2
ENSG00000006451	ENSGALG00000031893	RALA		ENSG00000198915	ENSGALG00000002525	RASGEF1A		ENSG00000185989	ENSGALG00000016817	RASA3
ENSG00000144118	ENSGALG00000026493	RALB		ENSG00000138670	ENSGALG00000010903	N/A		ENSG00000105808	ENSGALG00000001876	N/A
ENSG00000116473	ENSGALG00000001476	RAP1A		ENSG00000146090	ENSGALG00000006076	RASGEF1C		ENSG00000111344	ENSGALG00000008150	RASAL1
ENSG00000127314	ENSGALG00000009927	N/A		ENSG00000058335	ENSGALG00000008262	RASGRF1		ENSG00000075391	ENSGALG00000004323	RASAL2
ENSG00000125249	ENSGALG00000016889	RAP2A		ENSG00000113319	ENSGALG00000015598	RASGRF2		ENSG00000105122	ENSGALG00000039156	N/A
ENSG00000181467	ENSGALG00000042553	RAP2B		ENSG00000172575	ENSGALG00000009740	RASGRP1		ENSG00000213445	ENSGALG00000046200	N/A
ENSG00000123728	ENSGALG00000006061	RAP2C		ENSG00000068831	N/A	N/A		ENSG00000197555	ENSGALG00000009381	N/A
ENSG00000108551	ENSGALG00000004860	RASD1		ENSG00000152689	ENSGALG00000010435	RASGRP3		ENSG00000197555	ENSGALG00000045421	N/A
ENSG00000100302	ENSGALG00000012542	RASD2		ENSG00000171777	N/A	N/A		ENSG00000116991	ENSGALG00000037506	SIPA1L2
ENSG00000100276	N/A	N/A		ENSG00000143344	ENSGALG00000004728	RGL1		ENSG00000105738	N/A	N/A
ENSG00000270885	ENSGALG00000002086	RASL10B		ENSG00000237441	N/A	N/A		ENSG00000197283	N/A	N/A
ENSG00000122035	ENSGALG00000017099	RASL11A		ENSG00000205517	N/A	N/A		ENSG00000103197	ENSGALG00000005646	TSC2
ENSG00000128045	ENSGALG00000013948	RASL11B		ENSG00000159496	ENSGALG00000003412	N/A
ENSG00000103710	ENSGALG00000007349	RASL12		ENSG00000115904	ENSGALG00000039450	SOS1
ENSG00000088320	ENSGALG00000045602	REM1		ENSG00000100485	ENSGALG00000012273	SOS2
ENSG00000139890	N/A	N/A
ENSG00000134533	ENSGALG00000028186	RERG
ENSG00000111404	ENSGALG00000013112	RERGL
ENSG00000106615	ENSGALG00000039880	N/A
ENSG00000167550	N/A	N/A
ENSG00000143622	ENSGALG00000014647	RIT1
ENSG00000152214	ENSGALG00000033353	RIT2
ENSG00000166592	ENSGALG00000005140	RRAD
ENSG00000126458	N/A	N/A
ENSG00000133818	ENSGALG00000005998	RRAS2
Fly
RAS				RAS GEF				RAS GAP
ENSG00000176490	FBGN0037754	CG8500		ENSG00000171798	N/A	N/A		ENSG00000136848	FBGN0261570	CG42684
ENSG00000165023	FBGN0037754	CG8500		ENSG00000138193	N/A	N/A		ENSG00000136895	N/A	N/A
ENSG00000162595	FBGN0037754	CG8500		ENSG00000160271	FBGN0026376	RGL		ENSG00000196712	FBGN0015269	NF1
ENSG00000187682	N/A	N/A		ENSG00000136828	FBGN0034158	CG5522		ENSG00000164050	FBGN0025740	PLEXB
ENSG00000164949	FBGN0264753	RGK1		ENSG00000116191	FBGN0034158	CG5522		ENSG00000174373	FBGN0039466	CG5521
ENSG00000164949	FBGN0085419	RGK2		ENSG00000107263	FBGN0259228	C3G		ENSG00000188559	FBGN0039466	CG5521
ENSG00000164949	FBGN0260658	CG42541		ENSG00000109756	FBGN0265778	PDZ-GEF		ENSG00000076864	FBGN0264895	RAPGAP1
ENSG00000164949	FBGN0085426	RGK3		ENSG00000079337	FBGN0085421	EPAC		ENSG00000132359	FBGN0264895	RAPGAP1
ENSG00000174775	FBGN0003205	RAS85D		ENSG00000091428	FBGN0085421	EPAC		ENSG00000145715	FBGN0003969	VAP
ENSG00000133703	FBGN0003205	RAS85D		ENSG00000136237	FBGN0085421	EPAC		ENSG00000155903	FBGN0004390	RASGAP1
ENSG00000158186	N/A	N/A		ENSG00000158987	FBGN0265778	PDZ-GEF		ENSG00000185989	FBGN0004390	RASGAP1
ENSG00000197885	FBGN0040513	KAPPAB-RAS		ENSG00000108352	FBGN0085421	EPAC		ENSG00000105808	N/A	N/A
ENSG00000168256	FBGN0040513	KAPPAB-RAS		ENSG00000198915	FBGN0034230	CG4853		ENSG00000111344	N/A	N/A
ENSG00000213281	FBGN0003205	RAS85D		ENSG00000198915	FBGN0037188	CG7369		ENSG00000075391	FBGN0261570	CG42684
ENSG00000006451	FBGN0015286	RALA		ENSG00000138670	FBGN0037188	CG7369		ENSG00000105122	FBGN0261570	CG42684
ENSG00000144118	FBGN0015286	RALA		ENSG00000138670	FBGN0034230	CG4853		ENSG00000213445	N/A	N/A
ENSG00000116473	FBGN0004636	R		ENSG00000146090	FBGN0037188	CG7369		ENSG00000197555	N/A	N/A
ENSG00000127314	FBGN0004636	R		ENSG00000146090	FBGN0034230	CG4853		ENSG00000116991	N/A	N/A
ENSG00000125249	FBGN0025806	RAP2L		ENSG00000058335	N/A	N/A		ENSG00000105738	N/A	N/A
ENSG00000181467	FBGN0025806	RAP2L		ENSG00000113319	N/A	N/A		ENSG00000197283	FBGN0261570	CG42684
ENSG00000123728	FBGN0025806	RAP2L		ENSG00000172575	N/A	N/A		ENSG00000103197	FBGN0005198	GIG
ENSG00000108551	FBGN0035733	CG8641		ENSG00000068831	N/A	N/A
ENSG00000100302	FBGN0035733	CG8641		ENSG00000152689	N/A	N/A
ENSG00000100276	FBGN0037326	CG14669		ENSG00000171777	N/A	N/A
ENSG00000270885	FBGN0037326	CG14669		ENSG00000143344	FBGN0026376	RGL
ENSG00000122035	FBGN0035711	CG8519		ENSG00000237441	FBGN0026376	RGL
ENSG00000128045	FBGN0035711	CG8519		ENSG00000205517	FBGN0026376	RGL
ENSG00000103710	N/A	N/A		ENSG00000159496	FBGN0026376	RGL
ENSG00000088320	FBGN0085419	RGK2		ENSG00000115904	FBGN0001965	SOS
ENSG00000088320	FBGN0085426	RGK3		ENSG00000100485	FBGN0001965	SOS
ENSG00000088320	FBGN0260658	CG42541
ENSG00000088320	FBGN0264753	RGK1
ENSG00000139890	FBGN0264753	RGK1
ENSG00000139890	FBGN0085419	RGK2
ENSG00000139890	FBGN0085426	RGK3
ENSG00000139890	FBGN0260658	CG42541
ENSG00000134533	N/A	N/A
ENSG00000111404	N/A	N/A
ENSG00000106615	FBGN0041191	RHEB
ENSG00000167550	FBGN0041191	RHEB
ENSG00000143622	FBGN0265605	RIC
ENSG00000152214	FBGN0265605	RIC
ENSG00000166592	FBGN0085419	RGK2
ENSG00000166592	FBGN0260658	CG42541
ENSG00000166592	FBGN0085426	RGK3
ENSG00000166592	FBGN0264753	RGK1
ENSG00000126458	FBGN0003206	RAS64B
ENSG00000133818	N/A	N/A
